# Supplementary material for: The Absence of Retroelement Activity Is Characteristic for Childhood Acute Leukemias and Adult Acute Lymphoblastic Leukemia
Source: MDPI journal article supplement (doi:10.3390/ijms23031756), 2022-02-03
Supplement: s1 [file s1]

**Table S2.** Oligonucleotides used for library preparation.

| Name                      | Sequence                                               | Description             |
|---------------------------|--------------------------------------------------------|-------------------------|
| <b>Adapter ligation</b>   |                                                        |                         |
| St19N10hook_v2            | TAAGCACGACGCCTGCGTGCTGCGGNNNNNNNNNAGGCG<br>TCGTGCT     | SL-Adapter              |
| St19N10hook_TaqI          | CGTGACGACGCCTGCGTGCTGCGGNNNNNNNNNAGGCG<br>TCGTGCA      | SL-Adapter              |
| antiHook-TA               | pTAGTGTGCTCGTAGTCAAAAGACTACGAGCACAC                    | AntiSL-adapter          |
| antiHook-TaqI             | pCGGTGTGCTCGTAGTCAAAAGACTACGAGCACAC                    | AntiSL-adapter          |
| <b>1<sup>st</sup> PCR</b> |                                                        |                         |
| AY107                     | TCACCGTTTTAGCCGGGA                                     | AluYa5-specific primer  |
| BY267                     | GAGACCATCCCGGCTAAAAC                                   | AluYb8-specific primer  |
| St19roko-L1HS             | CGTCGTGCGTAGATGACAC                                    | L1HS-specific primer    |
| St19okor                  | GCGTGCTGCGG                                            | Adapter-specific primer |
| <b>2<sup>nd</sup> PCR</b> |                                                        |                         |
| korNxtSt19ok              | TCGGCAGCGTCAGATGTGTATAAGAGACAGCGTGCTGCGG               | Adapter-specific primer |
| korNxtAY19                | CGTGGGCTCGGAGATGTGTATAAGAGACAGAGCCACCGCGC              | AluY-specific primer    |
| KorNxt-L1HS               | CGTGGGCTCGGAGATGTGTATAAGAGACAGCATGTACCCTAA<br>AACTTAGA | L1HS-specific primer    |
