# Supplementary material for: The Absence of Retroelement Activity Is Characteristic for Childhood Acute Leukemias and Adult Acute Lymphoblastic Leukemia
Source: MDPI journal article supplement (doi:10.3390/ijms23031756), 2022-02-03
Supplement: s1 [file s1]

**Table S4.** Primers used for insertion validation.

| Name                                                 | Sequence                  |
|------------------------------------------------------|---------------------------|
| <b>Genomic locus specific primers for L1HS (GSP)</b> |                           |
| 61-AML-c2_For                                        | CCAGAGTGCCTGTTTCCTA       |
| 61-AML-c2_Rev                                        | ATTAAGGCACCAATAACTCAA     |
| 10-BALL-c15_For                                      | GCCTGAGTTAGTTTTGTATAAGA   |
| 10-BALL-c15_Rev                                      | AAGATGCAAAGACAACCTCAATGA  |
| 32-BALL-c1_For                                       | TTTGAATGAATTAGAAAAGAGGTC  |
| 32-BALL-c1_Rev                                       | GAGCACATAGACAGAGGAAG      |
| 38-TALL-c3_For                                       | TCCTGACAGCCTCATTGTAAA     |
| 38-TALL-c3_Rev                                       | CAAGACTTTGGTTCCATTCCC     |
| 41-TALL-cX_For                                       | CCAAATGCCAGGCCTGTAAT      |
| 41-TALL-cX_Rev                                       | AAGTGTGACCAAACACATGCC     |
| 45-TALL-c15_For                                      | AATGTAATCACCTTACCCAATG    |
| 45-TALL-c15_Rev                                      | CAGCCCCTTTTCAGTGTTTC      |
| ALLB0069_L1_chr8_F                                   | GATGGTTAACATTGGGAAGCC     |
| ALLB0069_L1_chr8_R                                   | CCCTCTTCTTCATATCTTCAC     |
| ALLB0101_L1_CHR22_F                                  | ATAGACAGCAAATAAAATGTGAAC  |
| ALLB0101_L1_CHR22_R                                  | GTGTATGAGTGAGTGTGAGTG     |
| <b>Genomic locus specific primers for AluYa5/Yb8</b> |                           |
| 50-AML-c9_For                                        | ACCTGACTCTGCACCTTTGA      |
| 50-AML-c9_Rev                                        | TGGGAGCCCTGCTGTCCT        |
| 50-AML-c13_For                                       | CCGGTGGAGAGAAGGGGATA      |
| 50-AML-c13_Rev                                       | AATACTGAACAGGTGTTTGCA     |
| 51-AML-c10_For                                       | TTTAGTCTAACGAATAGGTGCT    |
| 51-AML-c10_Rev                                       | ACACAAAATAATTAAAGATAAGTCA |
| 52-AML-c2_For                                        | CTGCAGGCTTCATGTCCTAA      |
| 52-AML-c2_Rev                                        | GAGACTGTGGAAAAAGAACTC     |
| 58-AML-c6_For                                        | TGTTGCAGCCTTGTTGGTG       |
| 58-AML-c6_Rev                                        | GAAAATCATTGGGATGATGGGA    |
| 58-AML-c16_For                                       | CCTTCACATTCATGACAACTTC    |
| 58-AML-c16_Rev                                       | GACTGGGGAGCCACAGGG        |
| 60-AML-c9_For                                        | CACCTTGTAATGTAAAATGGGAT   |
| 60-AML-c9_Rev                                        | GCCGGGTGCGATGGCTC         |
| 63-AML-c11_For                                       | GGAGGCAGAGAGGCAGAG        |
| 63-AML-c11_Rev                                       | ATCAGGGTGTGGAGGATGTC      |
| 33-BALL-c15_For                                      | GTCTTGGAGTGCATGGAAATA     |
| 33-BALL-c15_Rev                                      | GGCTCCCTCTTGGTCTCTT       |
| 35-TALL-c3_For                                       | GGTCTTACTCAGAGGAAGGA      |
| 35-TALL-c3_Rev                                       | GGATTACAGGAAGCAGTCATC     |
| 39-TALL-c19_For                                      | AGTCCTTGTGTGTTTTAGATAC    |
| 39-TALL-c19_Rev                                      | ACCAATCCCCTGAGAATACC      |
| 39-TALL-cx_For                                       | CACCACACTGAACAAATGCTA     |
| 39-TALL-cx_Rev                                       | ACTCCACAGGATGGAATGAAG     |
| 42-TALL-c8_For                                       | GAACTCTGGCTGATGGCAAA      |
| 42-TALL-c8_Rev                                       | CCTACCTCTCCACACCCTC       |
| 43-TALL-cX_For                                       | GCACAAGATGCGAGGTAGGT      |
| 43-TALL-cX_Rev                                       | CAAGGATGGATAGGTGGGC       |
| ALLB0124_Alu_chr4_F                                  | CTGCATTGCCAGAACATTAT      |
| ALLB0124_Alu_chr4_R                                  | GATGCCTTAGACTATACCGTG     |

|                                                   |                               |
|---------------------------------------------------|-------------------------------|
| Primers annealing to retroelements                |                               |
| L1HS specific primer (3'-end proximal)            |                               |
| b3-L1HS For2                                      | TGGGAGATATACCTAATGCTAGATGACAC |
| AluYa5 specific primers (5'- and 3'-end proximal) |                               |
| bAY102For                                         | GAGACCATCCCGGCTAAAAC          |
| bAY107Rev                                         | TCACCGTTTTAGCCGGGA            |
| AluYb8 specific primers (5'- and 3'-end proximal) |                               |
| b-BY270F                                          | CCACTGCAGTCCGCAGTCCGG         |
| b-BY267R                                          | CCCAGGCCGGACTGCGGAC           |
